# Supplementary material
Source: PubMed Central journal article supplement (PMC7965994)
Supplement: 2645_tables.pdf [file 2645_tables.pdf]

**On-Line Table 1: Baseline characteristics of patients and aneurysms**

| No. | Age (yr)/<br>Sex | Presentation                                                    | Infarction                    | Aneurysm<br>Location | Size <sup>a</sup><br>(mm) | Aneurysm<br>Thrombosis | Parent Vessel                            |
|-----|------------------|-----------------------------------------------------------------|-------------------------------|----------------------|---------------------------|------------------------|------------------------------------------|
| 1   | 55/F             | R brachiofacial hemiparesis and aphasia;<br>no headache         | L insular                     | L MCA (M1-M2)        | 19 × 12                   | Partial                | Normal; asymptomatic<br>M1 aneurysm      |
| 2   | 46/F             | Diplopia and dysarthria; no headache                            | Mesencephalic                 | R PCA (P1)           | 3 × 2                     | No                     | Normal                                   |
| 3   | 46/M             | R facial palsy and aphasia; no headache                         | L Sylvian                     | R MCA (M1)           | 8 × 5                     | Complete               | Normal                                   |
| 4   | 51/M             | L 3rd nerve palsy and dizziness;<br>no headache                 | Mesencephalic                 | Basilar tip          | 9 × 7                     | No                     | Normal                                   |
| 5   | 53/M             | R cerebellar syndrome with acute headache;<br>no neck stiffness | R PICA                        | R PICA               | 4 × 3                     | No                     | Occlusion (distal to<br>aneurysm)        |
| 6   | 58/F             | R cerebellar syndrome; no neck stiffness;<br>headache on day 2  | Bilateral PICA <sup>b</sup>   | R PICA               | 10 × 7                    | Complete               | Stenosis                                 |
| 7   | 48/F             | L hemiparesis; acute headache                                   | R Sylvian                     | R MCA (M1)           | 20 × 10                   | Complete               | Occlusion                                |
| 8   | 38/F             | R 3rd nerve palsy with orbital pain;<br>no headache             | R paramedian<br>mesencephalic | R PCA (P1)           | 4 × 3                     | No                     | Normal                                   |
| 9   | 63/M             | R hemiplegia and aphasia (NIHSS 21);<br>no headache             | L Sylvian                     | L MCA (M2)           | 5 × 3                     | Complete               | Stenosis and occlusion<br>of M2 branches |

<sup>a</sup>Indicates overall aneurysm size.

<sup>b</sup>Indicates complete right PICA and partial left PICA infarction attributed to an anatomic variant with bihemispheric supply of the right PICA.

**On-Line Table 2: Acute management and patient outcome**

| No. | CSF Analysis<br>(days from onset) | Acute Management                                                             | Length of<br>Follow-Up<br>(mo) <sup>a</sup> | Outcome                                                                                                                                                                                     |
|-----|-----------------------------------|------------------------------------------------------------------------------|---------------------------------------------|---------------------------------------------------------------------------------------------------------------------------------------------------------------------------------------------|
| 1   | Not done                          | Heparin during first 2 days and then<br>no antithrombotics                   | —                                           | Massive SAH on day 3 leading to death on day 4                                                                                                                                              |
| 2   | Hemorrhage<br>(2 days)            | No antithrombotic; endovascular<br>embolization on day 3 and aspirin         | 41                                          | mRS = 2 (4 months); long-term treatment with aspirin (75 mg/day);<br>persistent exclusion of aneurysm (41 months)                                                                           |
| 3   | Not done                          | Heparin during first 10 days and<br>then aspirin                             | 36                                          | mRS = 1 (4 months); long-term treatment with aspirin (100 mg/day);<br>partial aneurysm recanalization at 4 months, stable at 36 months                                                      |
| 4   | No hemorrhage<br>(6 days)         | Heparin during first 3 days and then<br>embolization and aspirin for 1 month | 30                                          | mRS = 1 (3 months); no antiplatelets; persistent exclusion of<br>aneurysm (30 months)                                                                                                       |
| 5   | Not done                          | Aspirin during first 2 days                                                  | —                                           | Massive SAH on day 2 leading to death on day 5                                                                                                                                              |
| 6   | No hemorrhage<br>(10 days)        | Clopidogrel from day 5                                                       | 44                                          | mRS = 0 (3 months); long-term treatment with clopidogrel<br>(75 mg/day); secondary endovascular embolization (recanalization<br>at 2 months); persistent occlusion of aneurysm at 44 months |
| 7   | Hemorrhage<br>(7 days)            | No treatment                                                                 | 12                                          | mRS = 1 (3 months); no antiplatelets; persistent occlusion of parent<br>vessel and aneurysm (12 months)                                                                                     |
| 8   | Not done                          | Endovascular embolization at day 6<br>and then heparin for 1 month           | 53                                          | mRS = 1 (4 months); no antiplatelets; secondary endovascular<br>embolization (recanalization at 4 months); persistent occlusion<br>of aneurysm at 53 months                                 |
| 9   | No hemorrhage<br>(24 hours)       | Aspirin, 250 mg, started on day 2                                            | 4                                           | mRS = 2 (3 months); aspirin 160 mg/day; surgical obliteration<br>(6 weeks, early recanalization)                                                                                            |

<sup>a</sup>—indicates XXX.
